# Supplementary material for: Dimeric binding of plant alkaloid ellipticine to human serum proteins
Source: Royal Society of Chemistry journal article supplement (doi:10.1039/c6ra06078a), 2016-01-01
Supplement: c6ra06078a1.pdf [file c6ra06078a1.pdf]

*Supplementary Information*

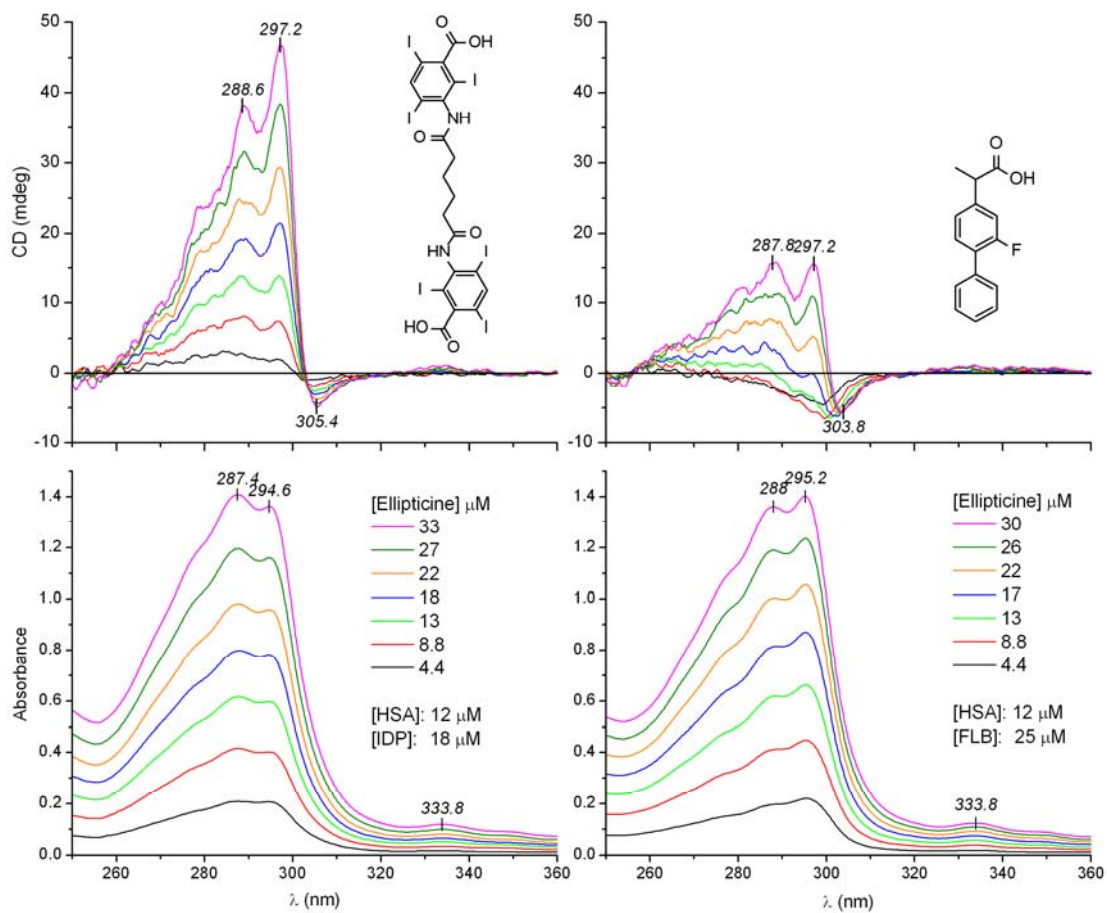

**Supplementary Figure 1.**

Difference CD and UV absorption spectra of ellipticine obtained with HSA saturated by the site IIA marker iodipamide (IDP) and IIIA marker (±)-flurbiprofen.
